# Supplementary material for: Genetic factors responsible for eating and cooking qualities of rice grains in a recombinant inbred population of an inter-subspecific cross
Source: PubMed Central journal article supplement (PMC4092229; doi:10.1007/s11032-014-0065-8), 2014-04-04

**Table S1.** The list of primer sequences of 6 starch synthesis gene used in interval mapping and marker regression analysis

| Locus           | Chr | Forward primer <sup>a</sup>    | Reverse primer            | size <sup>b</sup>    |
|-----------------|-----|--------------------------------|---------------------------|----------------------|
| <i>PUL</i>      | 4   | CCACCATTAAAGCATCATCAAC         | AGTTGTTATATTTTAGGATGGATGG | -20                  |
| <i>SBE4</i>     | 4   | CCATCACCTCAAATACATCACTC        | AGACTGGAATGCCCCCTTAGG     | -13                  |
| <i>Wx</i>       | 6   | TGTTGTTTCATCAGGAAGAACATCTCCAAG | TTAATTTCCAGCCCAACACC      | dCAPS( <i>Sty1</i> ) |
| <i>SBE1</i>     | 6   | TGCTACATAACACGCATACAAAGT       | AGACAAAAGCGAAAGGTAATGAG   | -331                 |
| <i>ISA1</i>     | 8   | ATAGATGCTAATGTGATGTGGC         | TGGTATAGGCACAACCGTAGA     | -10                  |
| <i>SSII-1_3</i> | 10  | ATCTTTAGACGATTAGCG             | AAGTCACAAGTAGAAGGG        | -6                   |

<sup>a</sup> primer sequences from Yan et al. (2011)

<sup>b</sup> the amplicon size of TNG 78 differed from TCS 17 which + and – indicate the amplicon size of TNG 78 is larger than which of TCS 17.

**Table S2.** The list of primer sequences of genes used in detection gene expression levels in immature grains by real-time PCR

| Gene                      | Accession           | Chr. | Forward                   | Reverse                   | Size |
|---------------------------|---------------------|------|---------------------------|---------------------------|------|
| <i>EFla-Q<sup>a</sup></i> | <i>Os03g0178000</i> | 3    | CGTTATTATCATATGCTCGCTGTGT | CAGCCGAAGGGCAATAATCA      | 101  |
| <i>SBE4<sup>b</sup></i>   | <i>Os04g0409200</i> | 4    | GCCAATGCCAGGAAGATGA       | GCGCAACATAGGATGGGTTT      | 128  |
| <i>PUL<sup>c</sup></i>    | <i>Os04g0164900</i> | 4    | AATCTCCGATGGCTGTTCCTT     | TTGAGTTCACACCCGATGCTAA    | 90   |
| <i>ISA2<sup>b</sup></i>   | <i>Os05g0393700</i> | 5    | TAGAGGTCCTCTTGGAGG        | AATCAGCTTCTGAGTCACCG      | 170  |
| <i>GBSSI<sup>c</sup></i>  | <i>Os06g0133000</i> | 6    | GATGCGTTTCAGCCTTCTTTG     | AGTATGGGTTGTTGTTGAGGTTTAG | 74   |
| <i>SSII-3<sup>b</sup></i> | <i>Os06g0229800</i> | 6    | GCTTCCGGTTTGTGTGTTC       | CTTAATACTCCCTCAACTCCACCAT | 54   |
| <i>CPE</i>                | <i>Os07g0604300</i> | 7    | AAACCAGGAAGCTGTGTAGA      | CTGGACTAGAGGTGTCAAGC      | 173  |
| <i>AGP</i>                | <i>Os07g0604800</i> | 7    | TGCGATGTACTTTGGTCTTA      | AGTGATCGGTAATCACCTTG      | 95   |
| <i>MADS18</i>             | <i>Os07g0605200</i> | 7    | ATCCCGACAACAAATAACAG      | AGACGGTTGAGCTTCTGACT      | 66   |
| <i>SSII-1<sup>c</sup></i> | <i>Os10g0437600</i> | 10   | GATGAAGTTCAGACGATGATGA    | TGACTTAGTTGTGCCTCATAATCCT | 113  |

<sup>a, b, c</sup> indicate the primer sequences adopted Jain et al. (2006), Ohdan et al. (2005), and Zeng et al. (2007), respectively.

**Table S3.** Descriptive statistics for eight grain quality-related physiochemical properties of rice harvested from the two crop seasons

| Year and trait | Parents |        | RIL population               |           |
|----------------|---------|--------|------------------------------|-----------|
|                | TNG 78  | TCS 17 | Mean±SD                      | Range     |
| <b>2010-II</b> |         |        |                              |           |
| PLS            | 43      | 43     | 47.46±11.22                  | 19-72     |
| PKV (cp)       | 2844    | 2453   | 2369.50±396.18               | 1355-3595 |
| HPV (cp)       | 1591    | 2182   | 1742.01±363.12               | 1028-2816 |
| BDV (cp)       | 1253    | 272    | 654.49±453.46                | 5-1712    |
| CPV (cp)       | 2911    | 4001   | 3313.19±683.81               | 2173-5115 |
| SBV (cp)       | 67      | 1548   | 916.69±752.88                | -566-2194 |
| PeT (min)      | 5.67    | 6.3    | 6.04±0.27                    | 5.5-6.8   |
| PaT (°C)       | 86.45   | 87.65  | 88.49±2.16                   | 74-92.9   |
| <b>2011-I</b>  |         |        |                              |           |
| PLS            | 55      | ND     | 46.73±10.6 <sup>a**</sup>    | 21-69     |
| PKV (cp)       | 3066    | 2954   | 2579.10±458.14               | 1149-3523 |
| HPV (cp)       | 1620    | 2556   | 1848.12±517.42 <sup>**</sup> | 605-3060  |
| BDV (cp)       | 1447    | 398    | 730.98±428.08 <sup>**</sup>  | 12-1766   |
| CPV (cp)       | 2830    | 4486   | 3556.75±963.8 <sup>**</sup>  | 1371-5488 |
| SBV (cp)       | -237    | 1532   | 985.18±813.09 <sup>*</sup>   | -628-2610 |
| PeT (min)      | 6.03    | 6.17   | 5.95±0.3 <sup>**</sup>       | 5.2-6.7   |
| PaT (°C)       | 79.6    | 86.43  | 86.57±2.65 <sup>**</sup>     | 75.6-91.3 |

<sup>a</sup> paired difference between the two crop seasons of 8 traits were detected by t-test which \* and \*\* are indicated at significant levels of 0.05 and 0.01 with 2-tails, respectively.

**Fig. S1.**

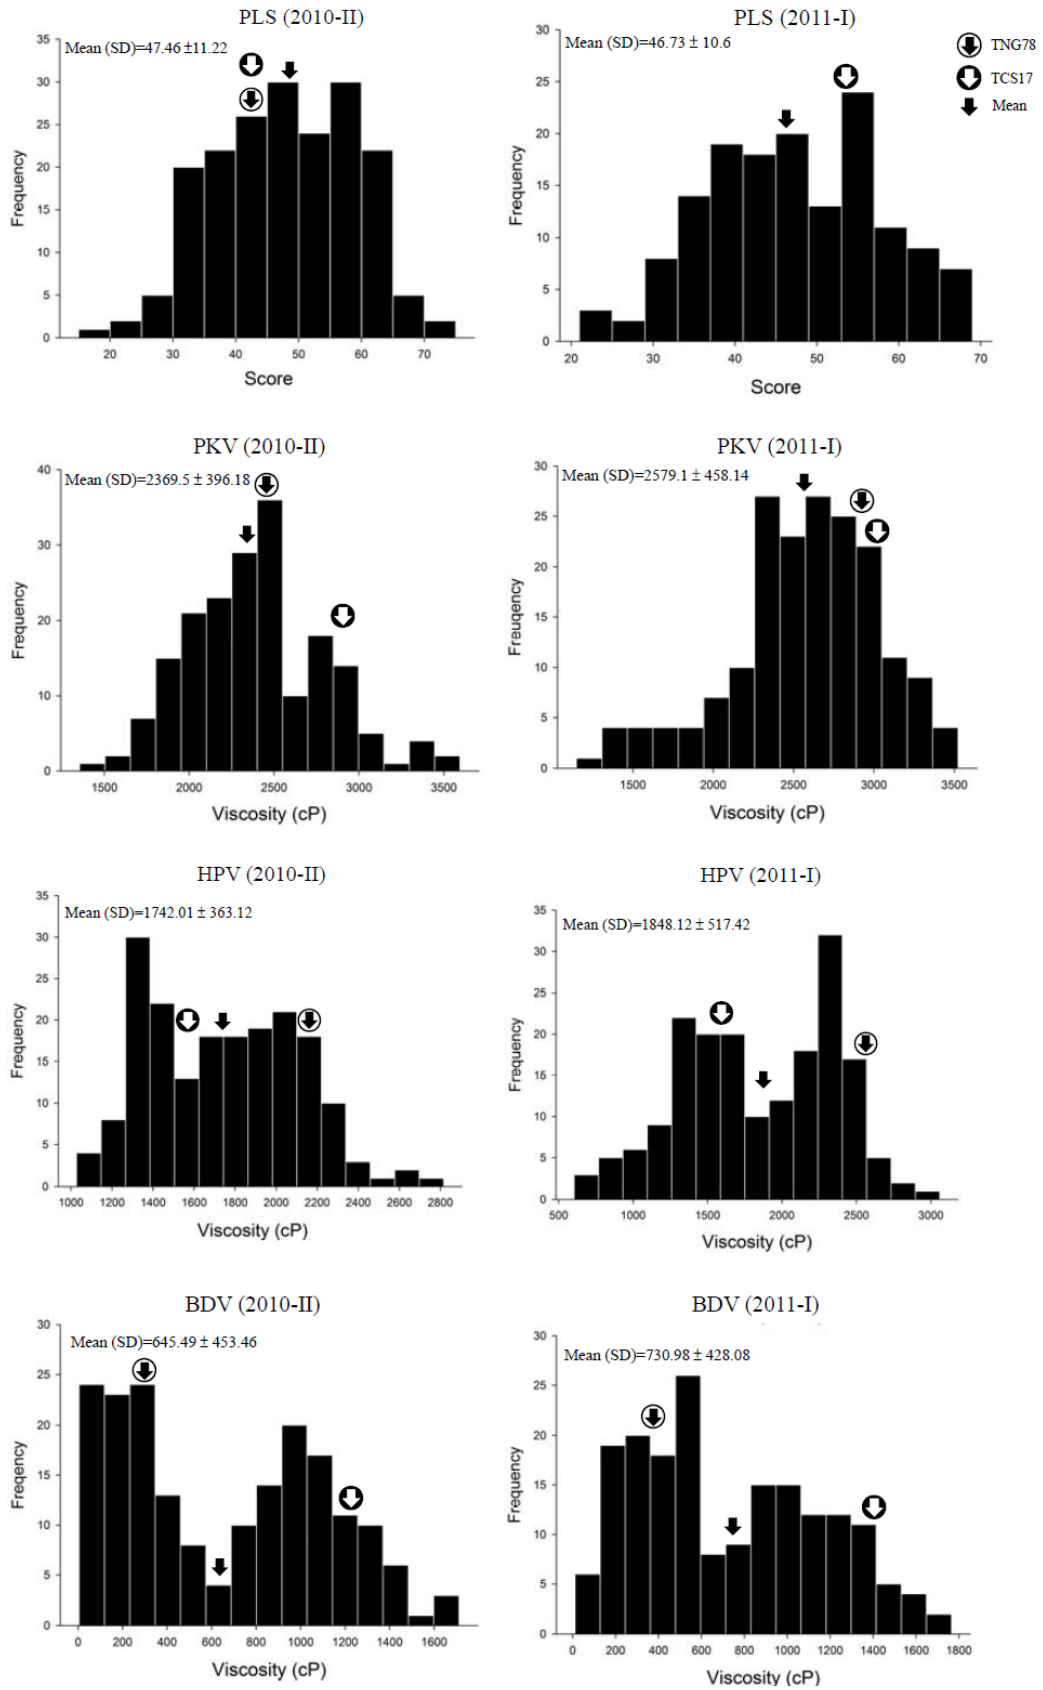

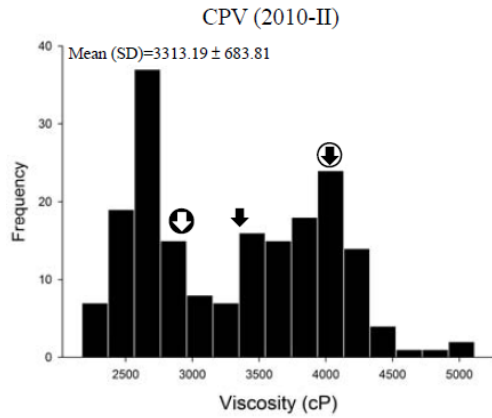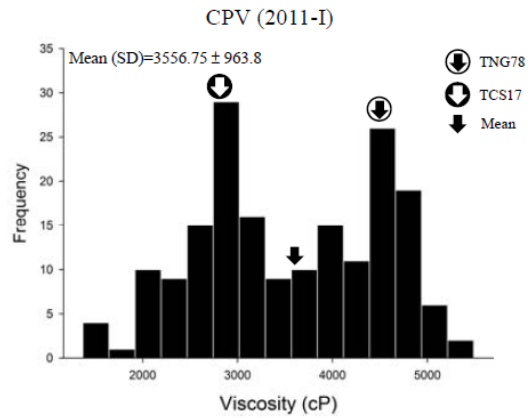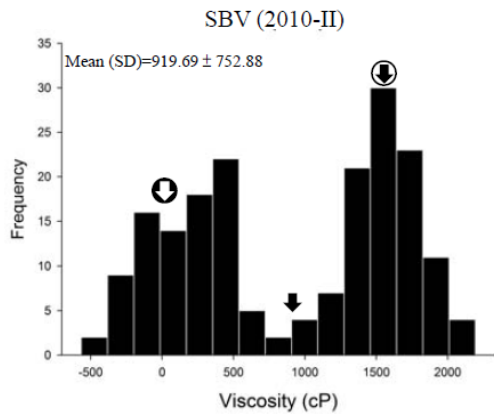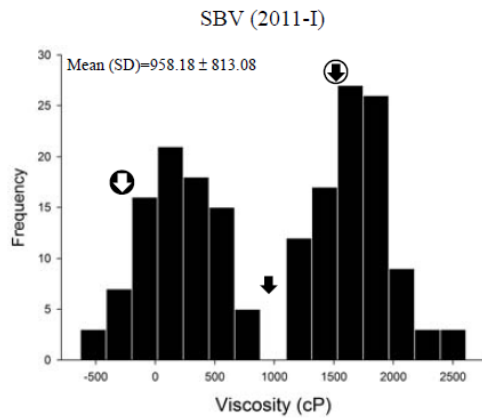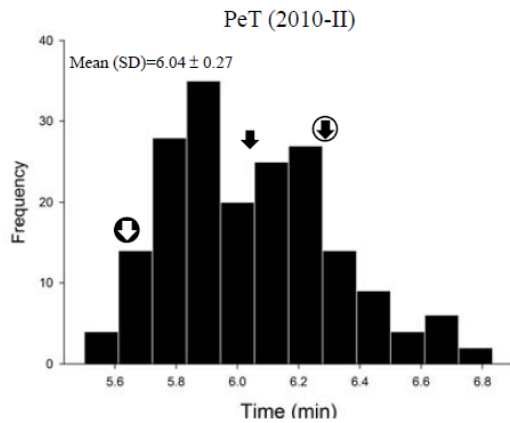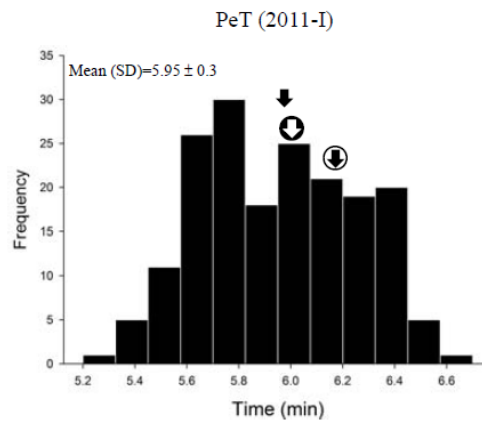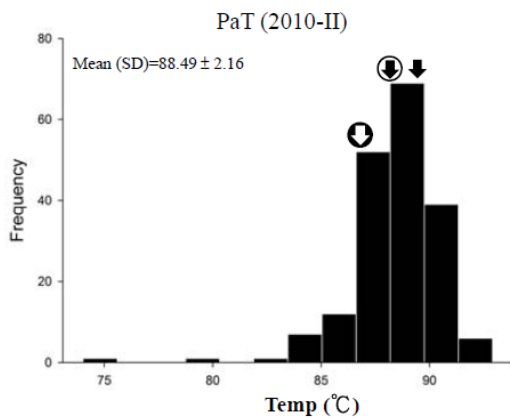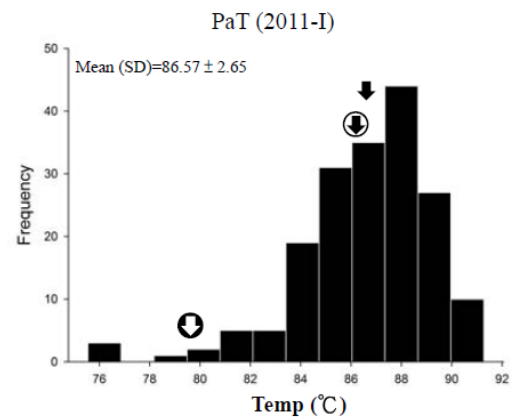

Supplement: 11032_2014_65_MOESM1_ESM.pdf [file 11032_2014_65_MOESM1_ESM.pdf]
